# Supplementary material
Source: Elsevier journal article supplement (https://www.sciencedirect.com/science/article/pii/S0033833815000764)
Supplement: mmc1 [file S0033833815000764:mmc1.doc]

Supplementary Material

Table 1. Baseline characteristics of the study population and the survival related to these variables. Comparison of total, cTACE, DEB-TACE patients with survival using Student t-test and χ2 test.

|  | **Total survivors** | **p** | **cTACE survivors** | **p** | **DEB-TACE survivors** | **p** |
| --- | --- | --- | --- | --- | --- | --- |
| Age; years; mean (SD) | 62.3 (11.12) | 0.636 | 59.9 (11.80) | 0.492 | 66.0 (9.84) | 0.752 |
| Sex, % males | 17.4% | **0.014** | 13.6% | **0.001** | 20.8% | 0.819 |
| Weight; Kg; mean (SD) | 73.5 (13.38) | 0.494 | 67.2 (8.48) | **0.016** | 83.0 (14.39) | 0.250 |
| Child-Pugh A; % | 14.8% | 0.099 | 42.2% | 0.057 | 21.4% | 0.855 |
| Alcoholic cirrhosis, % | 20.0% | 0.527 | 20.0% | 0.398 | 20.0% | 1.00 |
| HCV, % | 12.8% | **0.003** | 20.0% | 0.091 | 5.3% | **0.008** |
| HBV, % | 55.6% | **0.022** | 60.0% | 0.109 | 50.0% | 0.107 |
| Other tumors, %  Unifocal,%  Bilobar disease, %  Portal vein thrombosis, % | 16.7%  32.4%  6.7%  40.0% | 0.619  0.133  0.058  0.418 | 0.0%  43.8%  10.0%  50.0% | 0.338  0.079  0.091  0.348 | 25.0%  22.2%  0.0%  0.0% | 0.788  0.709  0.221  0.611 |

Table 2. Symptoms related to the TACE procedure requiring additional treatment (nº events and percentage of patients with adverse events that required additional treatment). Comparison of cTACE vs DEB-TACE using Student t-test and χ2 test.

| **Event** | **cTACE** | **DEB-TACE** | **p** | **cTACE** | **DEB-TACE** | **p** |
| --- | --- | --- | --- | --- | --- | --- |
| **Grade 2-4 AEs**  **Nausea/vomiting** | 54  27 | 31  11 | **<0.001**  **0.005** | 90%  70% | 40%  26.7% | **<0.001**  **0.001** |
| **Hypertension** | 6 | 6 | 1.000 | 20% | 16.7% | 0.739 |
| **Pain** | 6 | 9 | 0.451 | 16.7% | 23.3% | 0.519 |
| **Fever** | 10 | 2 | **0.009** | 36.7% | 6.7% | **0.005** |
| **Hydropic decompensation** | 5 | 3 | 0.456 | 16.7% | 10% | 0.448 |

Table 3. Distribution of primary causes of relapse respect of total number of patients. Comparison of cTACE vs DEB-TACE using χ2 test.

| **Cause** | **cTACE** | **DEB-TACE** | **p** |
| --- | --- | --- | --- |
| **Intrahepatic dissemination** | 26.6% | 56.6% | **0.018** |
| **Vascular invasion** | 10% | 0% | 0.076 |
| **Clinical intolerance to TACE** | 3.3% | 0% | 0.313 |
| **Liver failure** | 6.6% | 3.3% | 0.301 |
